# Supplementary material
Source: PubMed Central journal article supplement (PMC11383829)
Supplement: PBI-20-2006-s001.pdf [file PBI-20-2006-s001.pdf]

Figure S1

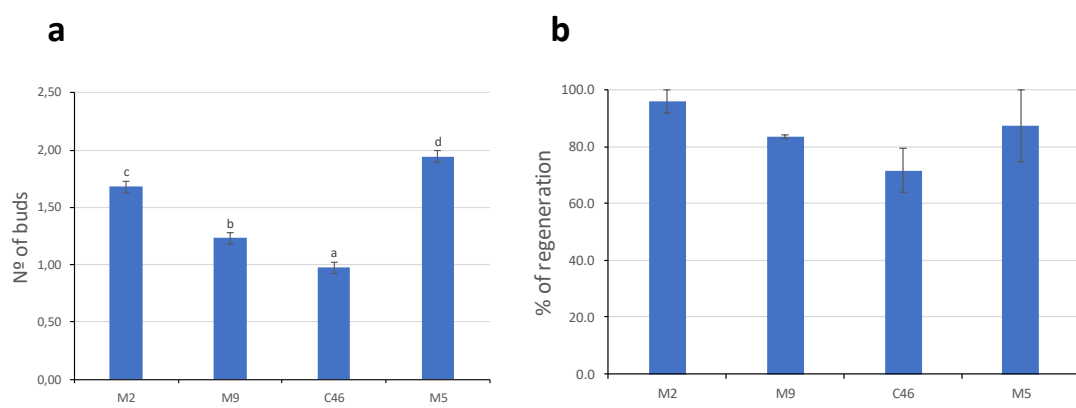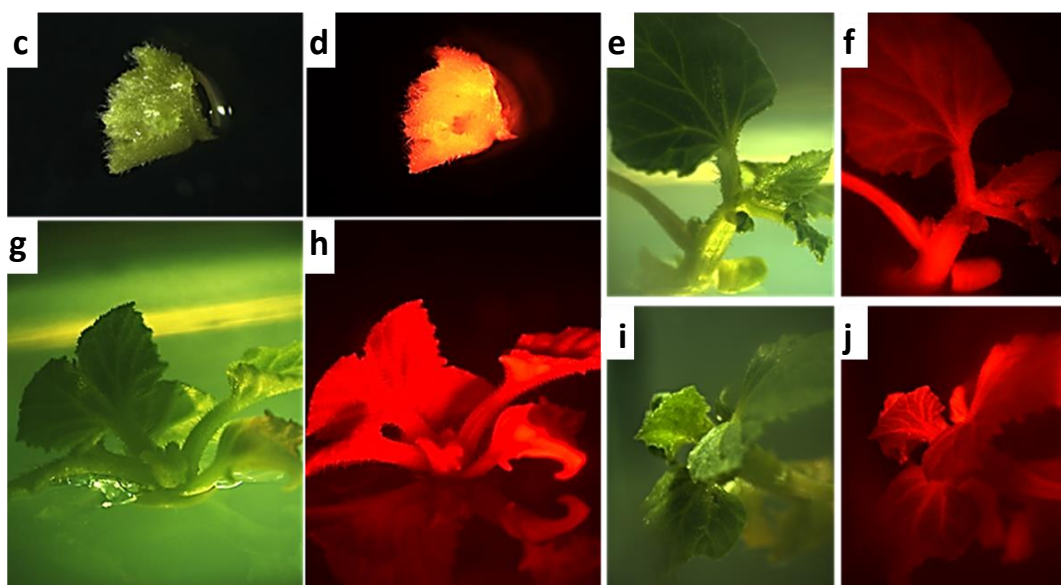

Figure S2

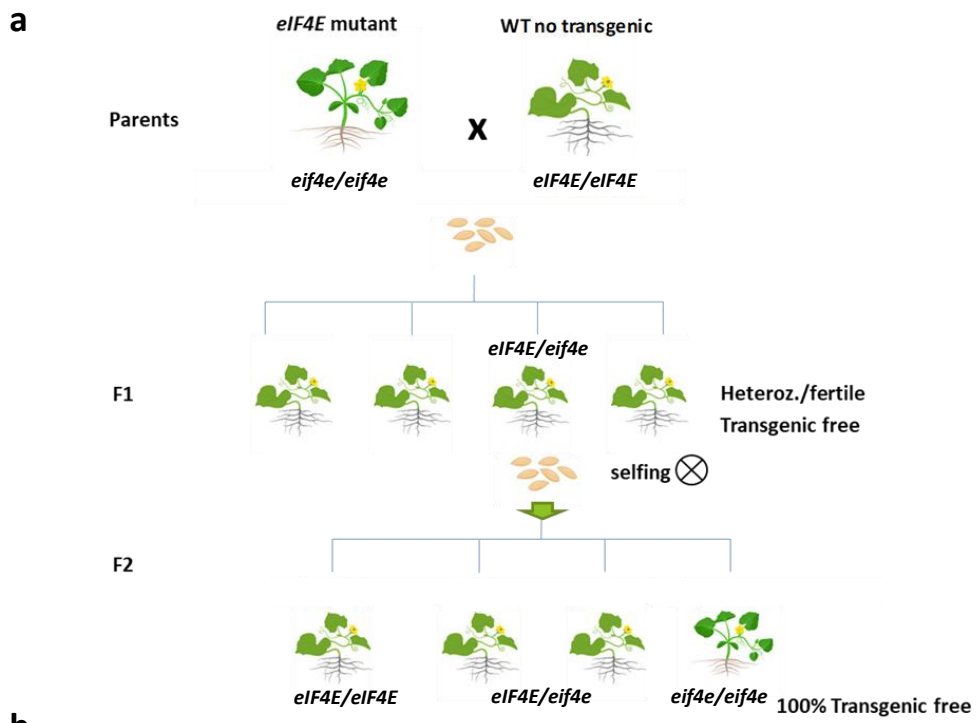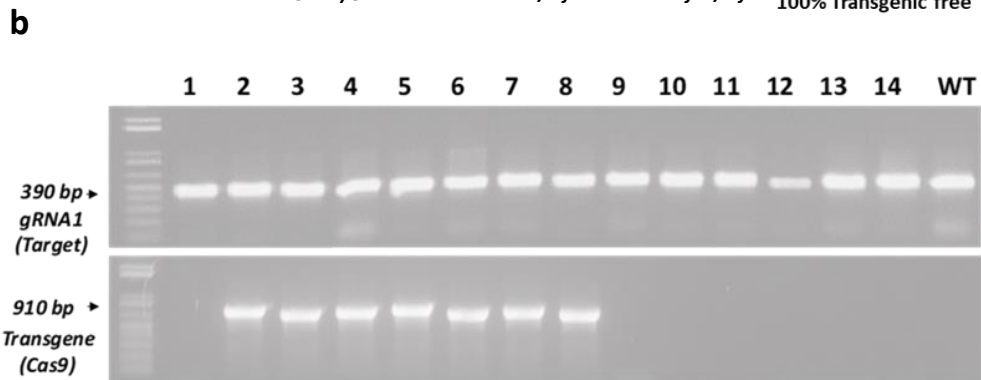

**c**

Cas9 (-) / *eIF4E-eif4e*: Plants N<sup>o</sup>. 1-9-10-11-12-13-14

TAATTCCATTGCTAATCAAAAACCTAGAGGACGTGGCGGTGACGAAAATGAGGAACTTGA WT  
 TAATTCCATTGCTAATCAAAAACCTAGAGGACGTGGCGGTGACGAAAATGAGGAACTTGA WT  
 TAATTCCATTGCTAATCAAAAACCTAGAGGAC-TGGCGGTGACGAAGATGAGGAACTTGA -1

Cas9 (+) / *eIF4E-eif4e*: Plants N<sup>o</sup>. 2-4-5-6-8

TAATTCCATTGCTAATCAAAAACCTAGAGGACGTGGCGGTGACGAAAATGAGGAACTTGA WT  
 TAATTCCATTGCTAATCAAAAACCTAGAGGACGTGGCGGTGACGAAAATGAGGAACTTGA WT  
 TAATTCCATTGCTAATCAAAAACCTAGAGGAC-TGGCGGTGACGAAGATGAGGAACTTGA -1

Cas9 (+) / *eif4e-eif4e*: Plants N<sup>o</sup>. 3-7

TAATTCCATTGCTAATCAAAAACCTAGAGGACGTGGCGGTGACGAAAATGAGGAACTTGA WT  
 TAATTCCATTGCTAATCAAAAACCTAGAGGAC-TGGCGGTGACGAAAATGAGGAACTTGA -1  
 TAATTCCATTGCTAATCAAAAACCTAGAGGAC-TGGCGGTGACGAAGATGAGGAACTTGA -1

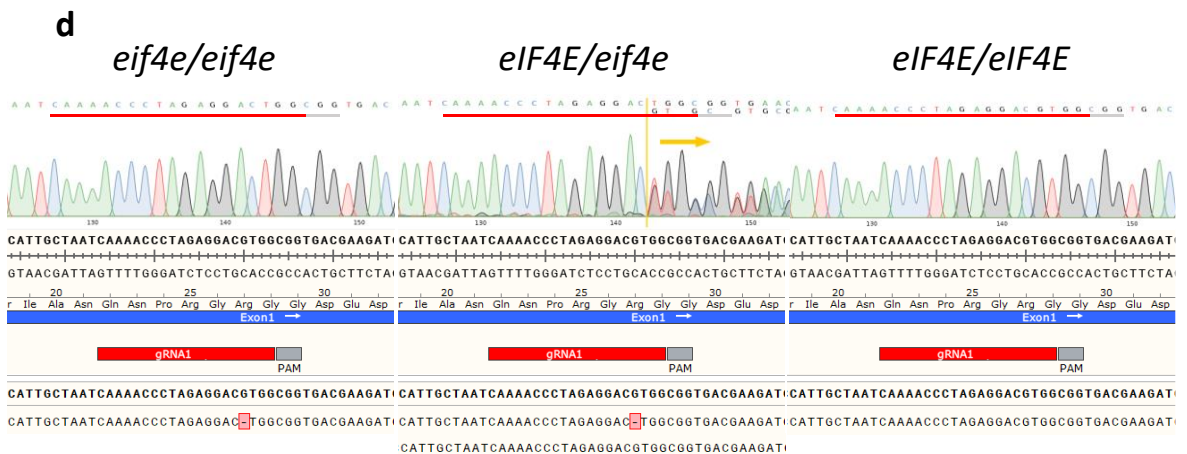

Figure S3

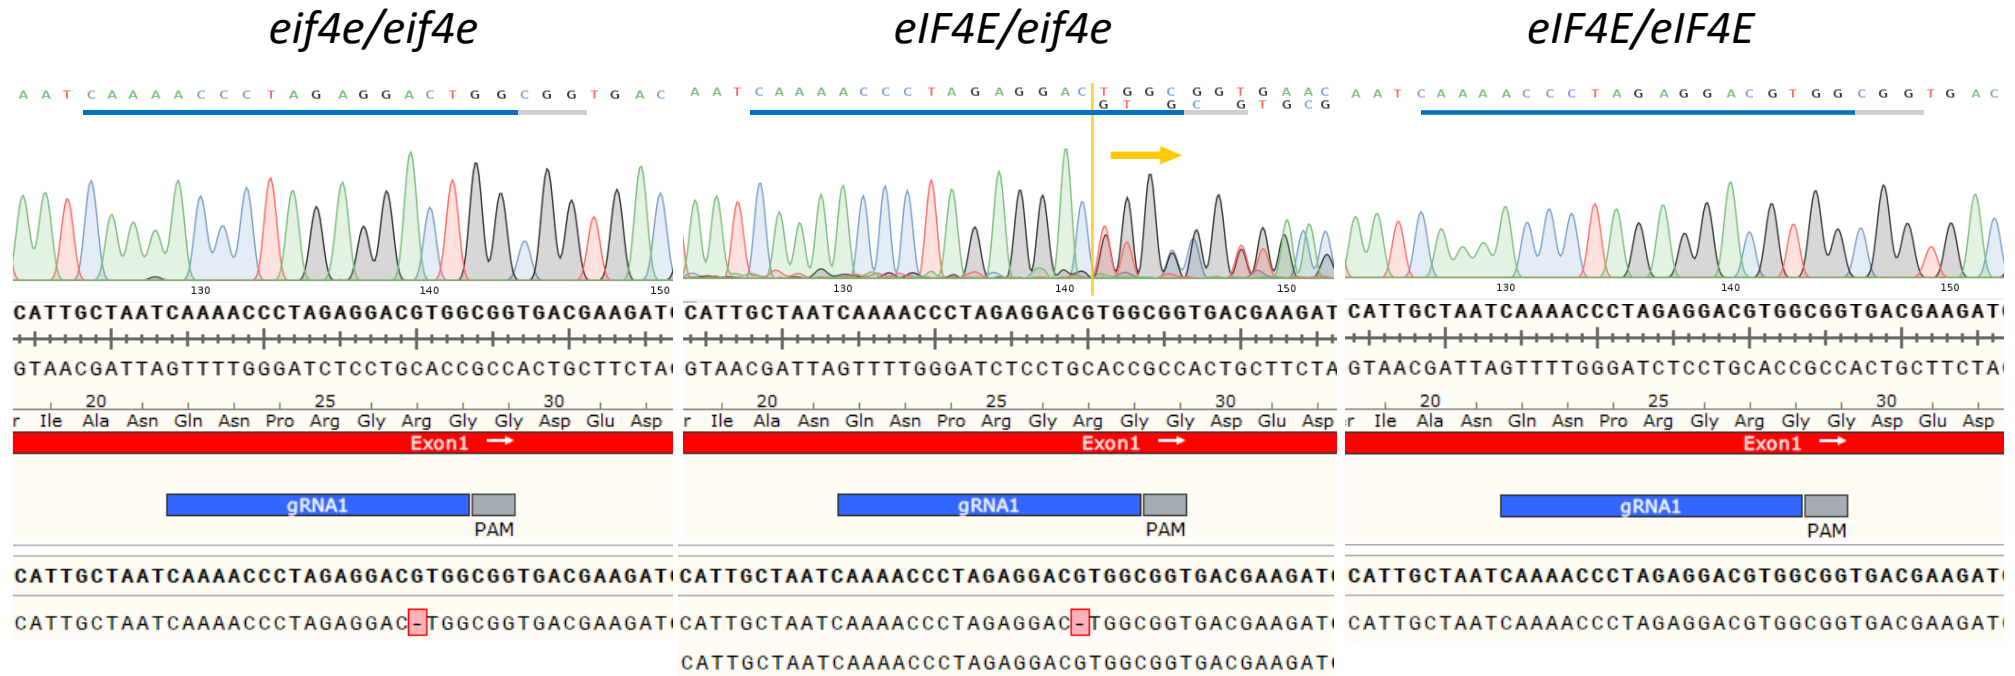

Figure S4

```

CVYV      -----GKVGYRRDKRVGRFVFDGPDEDIIEENFGVEYSHDVTKKMSKAQKLIKQAK  50
PVY       GKNKSKRIQALKFRHARDKRAGFEID-NNDDTIEEFFGSAYRKKGKGG-----  48
MWMV_SQ10_1.1 -GFSARQRQKLKFKDARIAKLGREYV-GDDGTIEHFFGEAYTKKGKGG-----  47
MWMV_RB    -GFSARQRQKLKFKDARIAKLGREYV-GDDGTIEHFFGEAYTKKGKGG-----  47
ZYMV      --SKKRRSQKLKFRDAYDRKVGREIF-GDDDTIGRTFGEAYTKRGKVKGN-----  47
WMV       --GKKRQIQKLKFRDAFDRKVGREYV-ADDYTMEHTFGEAYTKKGKQKGS-----  47
          *      : * : * : . ** * : *

CVYV      EKGWKIGKVDPRPKKIFRQLYGVNPLEFDEVYLTVGDFKGEVW-ETKDM---DIDEMYSDL 106
PVY       ----TTVGMGKSSRRFINMYGFDPT EYSFIQFV-DPLTGRQIEENVYADIRDIQERFSEV 103
MWMV_SQ10_1.1 ----KMHGMGVKTRKFVSTYGFKPEDYSYVRYL-DPLTGETVDENVNTDVSLSVQEHFGEL 102
MWMV_RB    ----KMHGMGVKTRKFVSTYGFKPEDYSYVRYL-DPLTGETVDENVNTDVSLSVQEHFGEL 102
ZYMV      ---NSTKGMGRKTRNFVHLYGVEPENYSFIRFV-DPLTGHTLDESTHTDISLSVQEEFGNI 103
WMV       ---TRTKGMGRKSRNFIMYGVPEPENYSMIRFV-DPLTGHTMDESTRVDIRLVQQEFGEI 103
          :.  : *  **..*  :. :  . :.*  *  : : : :

CVYV      YSDFN----LGNR-KGYSKDVYLVFSKKDSIEAVVDLQPHRSKMASSMSLNPMGFPEEE 161
PVY       RKKMVENDDIEMQALGSNTTIHAYFRKDWCDKALKIDLMPHNPLKVKCDKTINGIAKFPERE 163
MWMV_SQ10_1.1 RNKYIENDMMGKQKIASAPGIKAYYVRNAAKTALEVDLTPHNPLKFCDRHIAIAGFPERE 162
MWMV_RB    RNKYIENDMMDKQKIASAPGIKAYYVRNAAKTALEVDLTPHNPLKFCDRHIAIAGFPERE 162
ZYMV      REKFLENDLISRQSIINKPGIQAYFMGKGT EALKVDLTPHVPLLLCKNTNAIAGYPERE 163
WMV       REEMIGADELDPQRVYHNPGIQAYFIGKNAKEALKVDLTPHVPTLLCQNSNAIAGFPERE 163
          ..      : :      : : . .      : ** **      ..      : **.*

CVYV      GRWRQSGDVKMRKRI-----EEVEVQ- 183
PVY       LELRQTGPAVEVDVKDIPAQVEHE--- 188
MWMV_SQ10_1.1 NDLRQTGMAKEIPIISKVPAKNEDVTHE 190
MWMV_RB    YDLRQTGMAKEIPIGKVPKSEDVTHE 190
ZYMV      NELRQTGTPVKVSFKDVPEKNEHVELE- 190
WMV       GELRQTGLPQIVPKVDVPRAKERVEVE- 190
          **.*
    
```

Figure S5

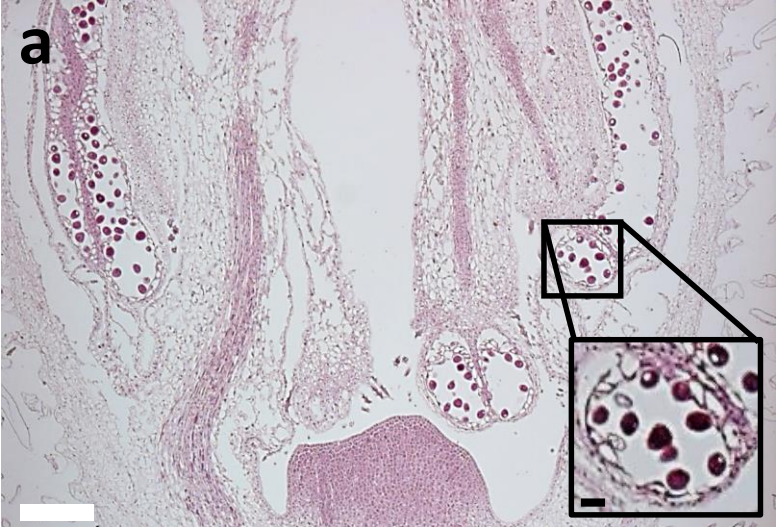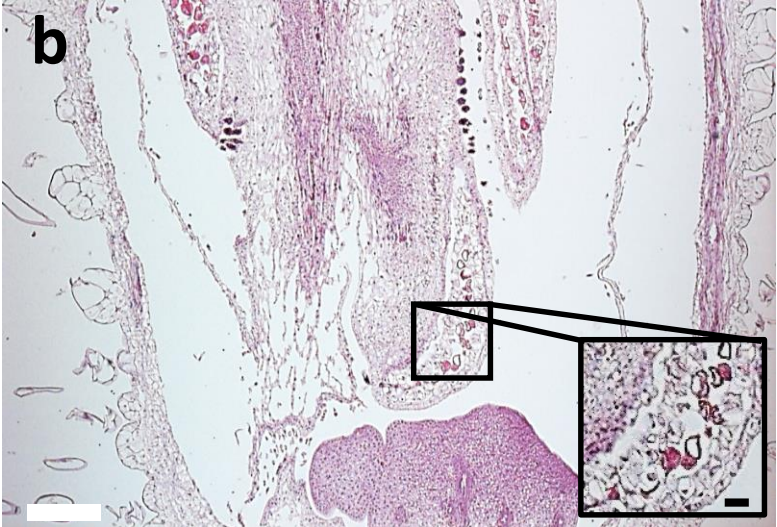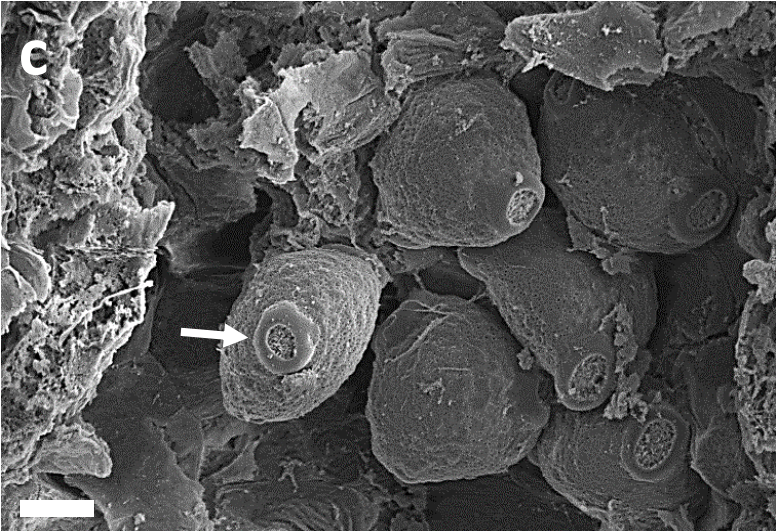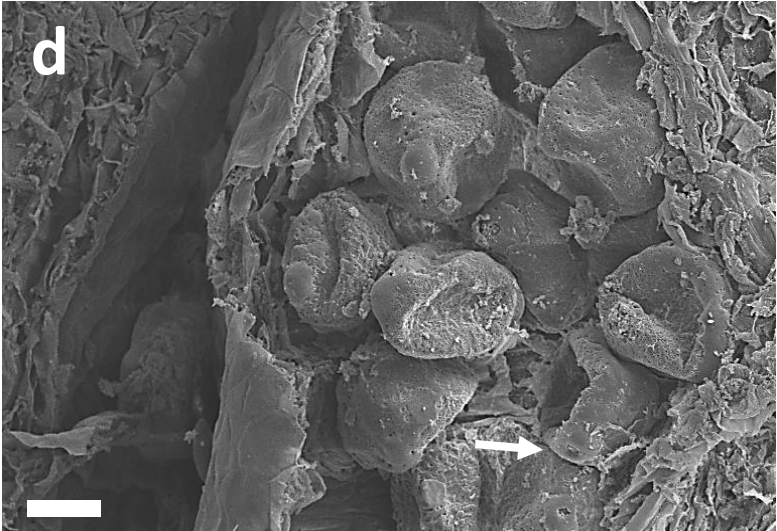

Figure S6

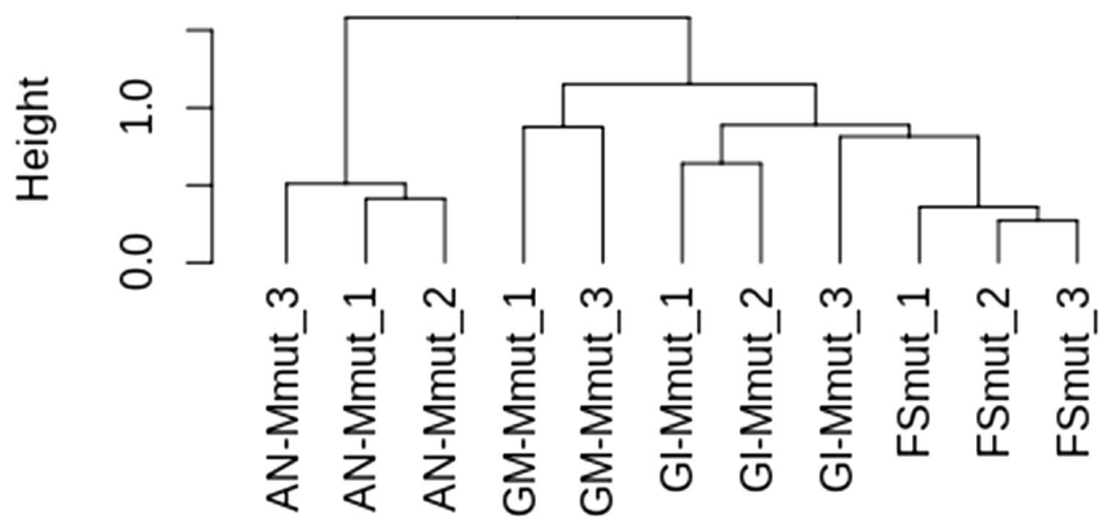

**a**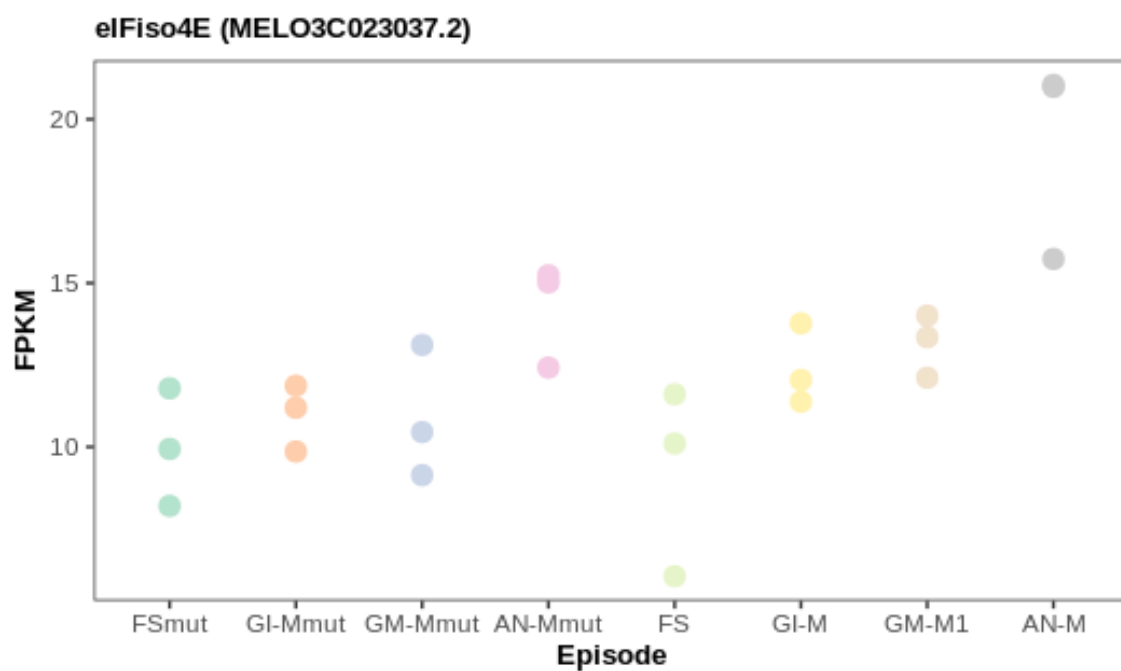**b**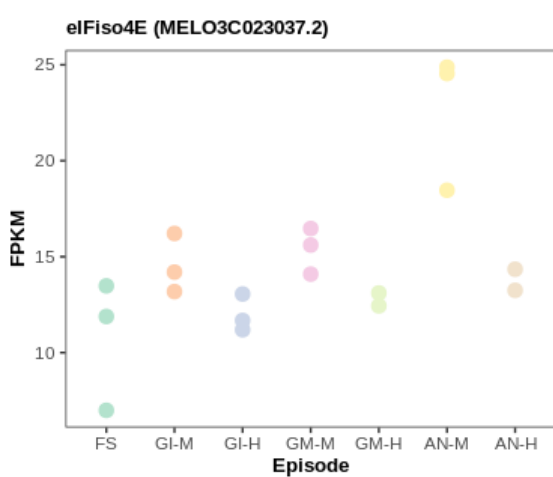**c**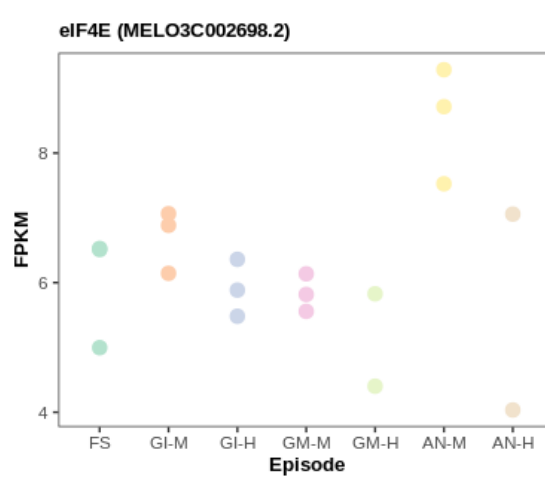

**Table S1.** Putative *eIF4E* CRISPR/Cas9 gRNA1 off-target sites

| Sequence of the putative off-target site | Off-targetscore | MMs  | Locus                  | Gene ID      | Gene                                  | Region     |
|------------------------------------------|-----------------|------|------------------------|--------------|---------------------------------------|------------|
| CAAAATCGTAGAAGACGTGGAGG                  | 0.551           | 3MMs | scaffold00023:-5325134 |              |                                       | Intergenic |
| CAAACCTCTAAAGGACGTGAAGG                  | 0.435           | 4MMs | scaffold00006:+4019441 | MELO3C006540 | beta-galactosidase 7-like             | CDS        |
| CAAACCGGAGAAGACGTGACGG                   | 0.344           | 4MMs | scaffold00005:+401743  | MELO3C005084 | E3 ubiquitin-protein ligase           | CDS        |
| GAAAACGCGAGAGGACGAGCGG                   | 0.177           | 4MMs | scaffold00016:+4417626 | MELO3C012320 | sucrose-phosphatase 2                 | CDS        |
| AAAAACCTTAGAAGAGGTGGAGG                  | 0.124           | 4MMs | scaffold00038:-1390329 | MELO3C019462 | Membralin, putative                   | CDS        |
| CAAACCCCTAGAAGACGTGGGAG                  | 0.12            | 2MMs | scaffold00024:-2063176 | MELO3C015061 | Growth inhibition and differentiation | CDS        |
| CAAAGACGTAGAGGACATGGCAG                  | 0.104           | 4MMs | scaffold00004:+7609278 |              |                                       | Intergenic |
| CAAACCATGAGGTCGTTGAGG                    | 0.076           | 4MMs | scaffold00012:-3766001 |              |                                       | Intergenic |
| CAAACCTGGAGGAGGAGGAGG                    | 0.05            | 4MMs | scaffold00053:+1762859 | MELO3C022610 | Formin-like protein                   | CDS        |



**Table S2.** Selected differentially expressed genes during male flower development in male-sterile *eif4e* mutants

| F5mut versus F5     |             |                |              |              |             |             |                                                                                  |
|---------------------|-------------|----------------|--------------|--------------|-------------|-------------|----------------------------------------------------------------------------------|
| GeneID              | baseMean    | log2FoldChange | lfcSE        | stat         | pvalue      | padj        | Gene_description                                                                 |
| MELO3C007237.2      | 704,2133864 | 1,326477173    | 0,364315073  | 3,641016443  | 0,000271564 | 0,003163174 | Apoptosis inhibitor 5-like protein API5                                          |
| MELO3C008417.2      | 3528,391737 | -1,308020453   | 0,209546706  | -6,242142772 | 4,32E-10    | 6,12E-08    | Bidirectional sugar transporter SWEET                                            |
| MELO3C005758.2      | 1467,982643 | -2,469692894   | 0,351893805  | -7,018290336 | 2,25E-12    | 7,34E-10    | Bidirectional sugar transporter SWEET                                            |
| MELO3C022341.2      | 3669,317871 | -3,462272444   | 0,875679526  | -3,953812257 | 7,69E-05    | 0,001149903 | Bidirectional sugar transporter SWEET                                            |
| MELO3C015961.2      | 1799,56506  | -1,240362818   | 0,259830798  | -4,773732853 | 1,81E-06    | 5,71E-05    | Ethylene receptor                                                                |
| MELO3C017940.2      | 153,7744199 | -2,760256574   | 0,477872466  | -5,776136465 | 7,64E-09    | 6,39E-07    | Ethylene-responsive transcription factor                                         |
| MELO3C014441.2      | 411,7120135 | -1,38312477    | 0,31047831   | -4,454819312 | 8,40E-06    | 0,000199281 | ethylene-responsive transcription factor 3-like                                  |
| MELO3C005465.2      | 165,6686375 | -1,969711237   | 0,608431462  | -3,237359277 | 0,001206414 | 0,009781202 | ethylene-responsive transcription factor ERF105                                  |
| MELO3C021306.2      | 3536,602112 | -1,294296722   | 0,308487021  | -4,195627797 | 2,72E-05    | 0,000498944 | ethylene-responsive transcription factor RAP2-3-like                             |
| MELO3C001947.2      | 902,2931563 | -1,253393143   | 0,319039738  | -3,928642713 | 8,54E-05    | 0,001254592 | eukaryotic translation initiation factor 3 subunit G-like                        |
| MELO3C020380.2      | 7060,019315 | -1,070385774   | 0,204173668  | -5,242526053 | 1,58E-07    | 7,96E-06    | Eukaryotic translation initiation factor 4G                                      |
| MELO3C022717.2      | 849,0112378 | -1,284613703   | 0,252873703  | -5,080060468 | 3,77E-07    | 1,57E-05    | FHA domain-containing protein FHA2                                               |
| MELO3C007468.2      | 1020,437469 | 1,394280965    | 0,380864029  | 3,660836565  | 0,000251393 | 0,002964074 | Male gametophyte defective 1                                                     |
| MELO3C004667.2      | 681,5668714 | -1,628869386   | 0,371559249  | -4,383875218 | 1,17E-05    | 0,000257038 | pollen receptor-like kinase 3                                                    |
| MELO3C024046.2      | 749,3084162 | 1,568180352    | 0,335879069  | 4,668883825  | 3,03E-06    | 8,81E-05    | Protein XRI1                                                                     |
| MELO3C013473.2      | 5485,980468 | -2,878672747   | 0,292447476  | -9,8433838   | 7,32E-23    | 1,34E-18    | tetraketide alpha-pyrone reductase 1                                             |
| G1mut-M versus GI-M |             |                |              |              |             |             |                                                                                  |
| GeneID              | baseMean    | log2FoldChange | lfcSE        | stat         | pvalue      | padj        | Gene_description                                                                 |
| MELO3C020400.2      | 663,0962885 | -1,662640113   | 0,446845441  | -3,720839375 | 1,99E-04    | 2,90E-03    | ABC transporter G family member 21                                               |
| MELO3C025486.2      | 2230,038087 | -1,476335508   | 0,398812406  | -3,701829451 | 2,14E-04    | 3,08E-03    | ABC transporter G family member 6                                                |
| MELO3C007237.2      | 704,2133864 | 1,337663016    | 0,3652220854 | 3,662614011  | 2,50E-04    | 0,00346385  | Apoptosis inhibitor 5-like protein API5                                          |
| MELO3C005473.2      | 500,8277454 | -1,353354402   | 0,262270095  | -5,160155224 | 2,47E-07    | 1,32E-05    | Cytochrome P450                                                                  |
| MELO3C011413.2      | 323,167111  | 1,34207876     | 0,391642049  | 3,426799452  | 6,11E-04    | 6,81E-03    | cytochrome P450 78A5                                                             |
| MELO3C019206.2      | 797,587466  | -2,33213805    | 0,328663954  | -7,095813291 | 1,28593E-12 | 4,26709E-10 | cytochrome P450 81E8-like                                                        |
| MELO3C018259.2      | 1198,48083  | 1,133243706    | 0,263316062  | 4,303739385  | 1,68E-05    | 4,13E-04    | cytochrome P450 CYP82D47-like                                                    |
| MELO3C026491.2      | 77,03835804 | -3,745944237   | 1,025740994  | -3,651939679 | 2,60E-04    | 0,003570512 | cytochrome P450 CYP82D47-like                                                    |
| MELO3C007480.2      | 214,3263893 | 2,258246851    | 0,523926913  | 4,31023258   | 1,63E-05    | 4,02E-04    | Cytochrome P450 family protein                                                   |
| MELO3C007481.2      | 89,66505357 | 2,956621002    | 0,870395236  | 3,396871766  | 6,82E-04    | 7,44E-03    | Cytochrome P450, putative                                                        |
| MELO3C026759.2      | 1218,575927 | -1,015658183   | 0,276107553  | -3,678487505 | 2,35E-04    | 3,30E-03    | Eukaryotic initiation factor 4F subunit p150 isoform 1                           |
| MELO3C035644.2      | 488,3204186 | 1,573628969    | 0,441137942  | 3,567203855  | 0,000360811 | 0,004560616 | eukaryotic translation initiation factor 3 subunit A-like                        |
| MELO3C020380.2      | 7060,019315 | -1,231358465   | 0,20444974   | -6,022933427 | 1,71284E-09 | 2,11163E-07 | Eukaryotic translation initiation factor 4G                                      |
| MELO3C021195.2      | 280,0171795 | -8,231725733   | 1,291353302  | -6,374495436 | 1,84E-10    | 3,26E-08    | LOW QUALITY PROTEIN: pollen-specific leucine-rich repeat extensin-like protein 3 |
| MELO3C000439.2      | 32,60402736 | 2,458449412    | 0,625765802  | 3,928705284  | 8,54044E-05 | 0,001502485 | MACPF domain-containing protein NSL1                                             |
| MELO3C006940.2      | 593,67716   | -1,288716306   | 0,290021555  | -4,443519047 | 8,85E-06    | 0,000247278 | MADS-box protein SOC1                                                            |
| MELO3C010769.2      | 814,6897542 | -1,109187375   | 0,310945668  | -3,567142077 | 3,61E-04    | 0,004560616 | Protein EARLY FLOWERING 3                                                        |
| MELO3C013473.2      | 5485,980468 | 2,114765252    | 0,293208272  | 7,212502023  | 5,49E-13    | 2,11231E-10 | tetraketide alpha-pyrone reductase 1                                             |
| GMmut-M versus GM-M |             |                |              |              |             |             |                                                                                  |
| GeneID              | baseMean    | log2FoldChange | lfcSE        | stat         | pvalue      | padj        | Gene_description                                                                 |
| MELO3C004397.2      | 15,19993202 | -8,174364274   | 2,399082222  | -3,407288087 | 0,000656118 | 0,004703573 | Alba DNA/RNA-binding protein                                                     |
| MELO3C023241.2      | 782,5566464 | -5,802492331   | 0,849023883  | -6,8343099   | 8,24E-12    | 6,00E-10    | callose synthase 5-like                                                          |
| MELO3C015764.2      | 1698,234989 | -1,072825018   | 0,255405293  | -4,200480757 | 2,66E-05    | 0,000326627 | F-box/LRR-repeat protein 17                                                      |
| MELO3C018902.2      | 859,8885756 | -1,589810503   | 0,250776049  | -6,339562763 | 2,30E-10    | 1,21E-08    | O-fucosyltransferase family protein                                              |
| MELO3C007031.2      | 314,47568   | -2,336574137   | 0,457919495  | -5,102587163 | 3,35E-07    | 7,46E-06    | Polygalacturonase QRT3                                                           |
| MELO3C024046.2      | 749,3084162 | 1,442623507    | 0,338040752  | 4,267602349  | 1,98E-05    | 0,00025333  | Protein XRI1                                                                     |
| MELO3C002541.2      | 12,00075028 | 5,835825858    | 1,724513773  | 3,384041316  | 0,000714273 | 0,005033808 | receptor-like serine/threonine-protein kinase SD1-8                              |
| MELO3C018777.2      | 317,270956  | 2,465954696    | 0,436118043  | 5,654328533  | 1,56E-08    | 5,12E-07    | Serine/threonine-protein kinase                                                  |
| MELO3C018168.2      | 291,8477294 | 1,085532829    | 0,313230762  | 3,465600958  | 0,000529048 | 0,003961654 | Serine/threonine-protein kinase                                                  |
| MELO3C016574.2      | 296,0353632 | 3,833411025    | 0,447799428  | 8,560553637  | 1,12E-17    | 2,72E-15    | Serine/threonine-protein kinase                                                  |
| MELO3C031872.2      | 452,8391878 | 1,635217583    | 0,348188187  | 4,696361464  | 2,65E-06    | 4,49E-05    | Serine/threonine-protein kinase                                                  |
| MELO3C016135.2      | 1917,036016 | 3,413824872    | 0,572641941  | 5,961534817  | 2,50E-09    | 1,03E-07    | Serine/threonine-protein kinase                                                  |
| MELO3C007338.2      | 616,4394961 | 2,442796574    | 0,358111479  | 6,821329996  | 9,02E-12    | 6,47E-10    | Serine/threonine-protein kinase                                                  |
| MELO3C002524.2      | 417,9389393 | 1,028557179    | 0,254874426  | 4,035544862  | 5,45E-05    | 0,000593225 | Serine/threonine-protein kinase                                                  |
| MELO3C013473.2      | 5485,980468 | 1,524656182    | 0,29763661   | 5,122542492  | 3,01E-07    | 6,83E-06    | tetraketide alpha-pyrone reductase 1                                             |
| MELO3C010012.2      | 1158,509672 | 1,06708994     | 0,272805935  | 3,911534911  | 9,17E-05    | 0,000917833 | Transmembrane protein                                                            |
| ANmut-M versus AN-M |             |                |              |              |             |             |                                                                                  |
| GeneID              | baseMean    | log2FoldChange | lfcSE        | stat         | pvalue      | padj        | Gene_description                                                                 |
| MELO3C020400.2      | 663,0962885 | -1,365818728   | 0,446022444  | -3,06221973  | 0,002197021 | 0,01427542  | ABC transporter G family member 21                                               |
| MELO3C007237.2      | 704,2133864 | 1,300945783    | 0,369715104  | 3,518779107  | 0,000433538 | 0,003778167 | Apoptosis inhibitor 5-like protein API5                                          |
| MELO3C005473.2      | 500,8277454 | -1,189004515   | 0,252718281  | -4,704861512 | 2,54E-06    | 5,04E-05    | Cytochrome P450                                                                  |
| MELO3C019206.2      | 797,587466  | -1,413344816   | 0,330031895  | -4,282449178 | 1,85E-05    | 0,000276837 | cytochrome P450 81E8-like                                                        |
| MELO3C035644.2      | 488,3204186 | 1,57617869     | 0,444924833  | 3,542572974  | 0,000396244 | 0,003492468 | eukaryotic translation initiation factor 3 subunit A-like                        |
| MELO3C020380.2      | 7060,019315 | -1,086158722   | 0,20399723   | -5,324379766 | 1,01E-07    | 3,22E-06    | Eukaryotic translation initiation factor 4G                                      |
| MELO3C021195.2      | 280,0171795 | -10,92536171   | 0,896055537  | -12,19272831 | 3,40E-34    | 4,65E-31    | LOW QUALITY PROTEIN: pollen-specific leucine-rich repeat extensin-like protein 3 |
| MELO3C013473.2      | 5485,980468 | -1,175491161   | 0,295897684  | -3,972627115 | 7,11E-05    | 0,000854312 | tetraketide alpha-pyrone reductase 1                                             |
